# Supplementary material for: A long-term epigenetic memory switch controls bacterial virulence bimodality
Source: eLife. 2017 Feb 7;6:e19599. doi: 10.7554/eLife.19599 (PMC5295817; doi:10.7554/eLife.19599)
Supplement: Figure 1—source data 1. — Data collected from four experiments. The data were collected by the ScanningManager software application and analyzed by TimeLapse analysis software application http://bio-site.phys.huji.ac.il/Materials. For figures histogram was fitted to total 100% bacteria. Data columns marked with * and ** are used for creating Figure 1A and C respectively. DOI: http://dx.doi.org/10.7554/eLife.19599.004 [file elife-19599-fig1-data1.xlsx]

## Sheet: Sheet1
	raw histogram								fraction of total bacteria								*-results presented in Figure 1A
total:	518	348	177	318	1184	444	724	713	100	100	100	100	100	100	100	100	**-results presented in Figure 1C
scan_date	20110131	20110512	20120320	20150811	20150701	20120126	20110512	20130205	20110131	20110512	20120320	20150811	20150701	20120126	20110512	20130205
Experimental conditions	Non-activation	Non-activation	Non-activation	Non-activation	Activation	Activation	Activation	Activation	Non-activation	Non-activation	Non-activation	Non-activation	Activation	Activation	Activation	Activation
TimeAxes	EPEC-LB	EPEC-LB	EPEC-LB	EPEC-LB	EPEC-ACT	EPEC-ACT	EPEC-ACT	EPEC-ACT	* EPEC-LB	EPEC-LB	EPEC-LB	EPEC-LB	** EPEC-ACT	EPEC-ACT	EPEC-ACT	EPEC-ACT
0	0	0	0	0	0	0	0	0	0	0	0	0	0	0	0	0
15	0	0	0	0	0	0	0	0	0	0	0	0	0	0	0	0
30	0	0	0	0	0	0	0	0	0	0	0	0	0	0	0	0
45	0	0	0	0	0	0	0	0	0	0	0	0	0	0	0	0
60	0	0	0	0	0	0	0	0	0	0	0	0	0	0	0	0
75	0	0	0	0	0	0	0	0	0	0	0	0	0	0	0	0
90	0	0	0	0	0	0	0	0	0	0	0	0	0	0	0	0
105	0	0	0	0	0	0	0	0	0	0	0	0	0	0	0	0
120	0	0	0	0	0	0	0	0	0	0	0	0	0	0	0	0
135	0	0	0	0	0	0	0	0	0	0	0	0	0	0	0	0
150	0	0	0	0	0	0	0	0	0	0	0	0	0	0	0	0
165	0	0	0	0	0	0	0	0	0	0	0	0	0	0	0	0
180	0	0	0	0	0	0	0	0	0	0	0	0	0	0	0	0
195	0	0	0	0	0	0	0	0	0	0	0	0	0	0	0	0
210	0	0	0	0	0	0	0	0	0	0	0	0	0	0	0	0
225	0	0	0	0	0	0	0	0	0	0	0	0	0	0	0	0
240	0	0	0	0	0	0	0	0	0	0	0	0	0	0	0	0
255	0	0	0	0	0	0	0	0	0	0	0	0	0	0	0	0
270	0	0	0	0	0	0	0	0	0	0	0	0	0	0	0	0
285	0	0	0	0	0	0	0	0	0	0	0	0	0	0	0	0
300	0	0	0	0	0	0	0	0	0	0	0	0	0	0	0	0
315	0	0	0	0	0	0	0	0	0	0	0	0	0	0	0	0
330	0	0	0	0	0	0	0	0	0	0	0	0	0	0	0	0
345	0	0	0	0	0	0	0	0	0	0	0	0	0	0	0	0
360	0	0	0	0	0	0	0	0	0	0	0	0	0	0	0	0
375	0	0	0	0	0	0	0	0	0	0	0	0	0	0	0	0
390	0	0	0	0	0	0	0	0	0	0	0	0	0	0	0	0
405	0	0	0	0	0	0	0	0	0	0	0	0	0	0	0	0
420	0	0	0	0	0	0	0	0	0	0	0	0	0	0	0	0
435	0	0	0	0	0	0	0	0	0	0	0	0	0	0	0	0
450	0	0	0	0	0	0	0	0	0	0	0	0	0	0	0	0
465	0	0	0	0	0	0	0	0	0	0	0	0	0	0	0	0
480	0	0	0	0	0	0	0	0	0	0	0	0	0	0	0	0
495	0	0	0	0	0	0	0	0	0	0	0	0	0	0	0	0
510	0	0	0	0	0	0	0	2	0	0	0	0	0	0	0	0.280505
525	0	0	0	0	0	0	0	2	0	0	0	0	0	0	0	0.280505
540	0	0	0	0	10	1	0	9	0	0	0	0	0.844595	0.225225	0	1.26227
555	0	2	1	0	40	1	4	25	0	0.574713	0.564972	0	3.37838	0.225225	0.552486	3.50631
570	0	11	1	4	129	8	25	57	0	3.16092	0.564972	1.25786	10.8953	1.8018	3.45304	7.99439
585	2	52	0	16	230	28	62	55	0.3861	14.9425	0	5.03145	19.4257	6.30631	8.56354	7.71388
600	4	63	8	63	236	62	96	57	0.772201	18.1034	4.51977	19.8113	19.9324	13.964	13.2597	7.99439
615	24	55	27	79	88	50	78	32	4.6332	15.8046	15.2542	24.8428	7.43243	11.2613	10.7735	4.48808
630	60	103	50	64	51	49	64	10	11.583	29.5977	28.2486	20.1258	4.30743	11.036	8.83978	1.40252
645	96	0	36	32	23	33	39	5	18.5328	0	20.339	10.0629	1.94257	7.43243	5.38674	0.701262
660	101	44	19	13	42	13	21	21	19.4981	12.6437	10.7345	4.08805	3.5473	2.92793	2.90055	2.9453
675	83	0	10	8	50	17	31	20	16.0232	0	5.64972	2.51572	4.22297	3.82883	4.28177	2.80505
690	49	4	6	2	92	24	49	79	9.45946	1.14943	3.38983	0.628931	7.77027	5.40541	6.76796	11.0799
705	37	2	2	4	94	41	63	87	7.14286	0.574713	1.12994	1.25786	7.93919	9.23423	8.70166	12.202
720	18	0	4	1	53	37	68	98	3.4749	0	2.25989	0.314465	4.47635	8.33333	9.39227	13.7447
735	10	6	6	5	33	33	57	71	1.9305	1.72414	3.38983	1.57233	2.78716	7.43243	7.87293	9.95792
750	10	0	2	4	4	23	35	43	1.9305	0	1.12994	1.25786	0.337838	5.18018	4.83425	6.03086
765	5	2	2	5	3	15	21	27	0.965251	0.574713	1.12994	1.57233	0.253378	3.37838	2.90055	3.78682
780	2	1	1	0	3	6	6	10	0.3861	0.287356	0.564972	0	0.253378	1.35135	0.828729	1.40252
795	3	0	0	4	0	1	0	1	0.579151	0	0	1.25786	0	0.225225	0	0.140252
810	2	1	0	1	0	1	0	1	0.3861	0.287356	0	0.314465	0	0.225225	0	0.140252
825	2	0	0	2	0	1	2	1	0.3861	0	0	0.628931	0	0.225225	0.276243	0.140252
840	1	0	2	2	1	0	1	0	0.19305	0	1.12994	0.628931	0.0844595	0	0.138122	0
855	2	0	0	2	0	0	1	0	0.3861	0	0	0.628931	0	0	0.138122	0
870	0	0	0	1	0	0	0	0	0	0	0	0.314465	0	0	0	0
885	2	0	0	0	0	0	1	0	0.3861	0	0	0	0	0	0.138122	0
900	1	0	0	2	0	0	0	0	0.19305	0	0	0.628931	0	0	0	0
915	1	1	0	1	0	0	0	0	0.19305	0.287356	0	0.314465	0	0	0	0
930	1	0	0	1	0	0	0	0	0.19305	0	0	0.314465	0	0	0	0
945	0	0	0	0	0	0	0	0	0	0	0	0	0	0	0	0
960	1	0	0	0	1	0	0	0	0.19305	0	0	0	0.0844595	0	0	0
975	0	1	0	1	0	0	0	0	0	0.287356	0	0.314465	0	0	0	0
990	0	0	0	1	0	0	0	0	0	0	0	0.314465	0	0	0	0
1005	0	0	0	0	0	0	0	0	0	0	0	0	0	0	0	0
1020	0	0	0	0	0	0	0	0	0	0	0	0	0	0	0	0
1035	0	0	0	0	0	0	0	0	0	0	0	0	0	0	0	0
1050	0	0	0	0	0	0	0	0	0	0	0	0	0	0	0	0
1065	0	0	0	0	0	0	0	0	0	0	0	0	0	0	0	0
1080	0	0	0	0	0	0	0	0	0	0	0	0	0	0	0	0
1095	0	0	0	0	0	0	0	0	0	0	0	0	0	0	0	0
1110	0	0	0	0	1	0	0	0	0	0	0	0	0.0844595	0	0	0
1125	1	0	0	0	0	0	0	0	0.19305	0	0	0	0	0	0	0
1140	0	0	0	0	0	0	0	0	0	0	0	0	0	0	0	0
1155	0	0	0	0	0	0	0	0	0	0	0	0	0	0	0	0
1170	0	0	0	0	0	0	0	0	0	0	0	0	0	0	0	0
1185	0	0	0	0	0	0	0	0	0	0	0	0	0	0	0	0
1200	0	0	0	0	0	0	0	0	0	0	0	0	0	0	0	0
1215	0	0	0	0	0	0	0	0	0	0	0	0	0	0	0	0
1230	0	0	0	0	0	0	0	0	0	0	0	0	0	0	0	0
1245	0	0	0	0	0	0	0	0	0	0	0	0	0	0	0	0
1260	0	0	0	0	0	0	0	0	0	0	0	0	0	0	0	0
1275	0	0	0	0	0	0	0	0	0	0	0	0	0	0	0	0
1290	0	0	0	0	0	0	0	0	0	0	0	0	0	0	0	0
1305	0	0	0	0	0	0	0	0	0	0	0	0	0	0	0	0
